# Supplementary material
Source: PubMed Central journal article supplement (PMC2893476)
Supplement: supp_76_12_4080__1.pdf [file supp_76_12_4080__1.pdf]

Figure A1

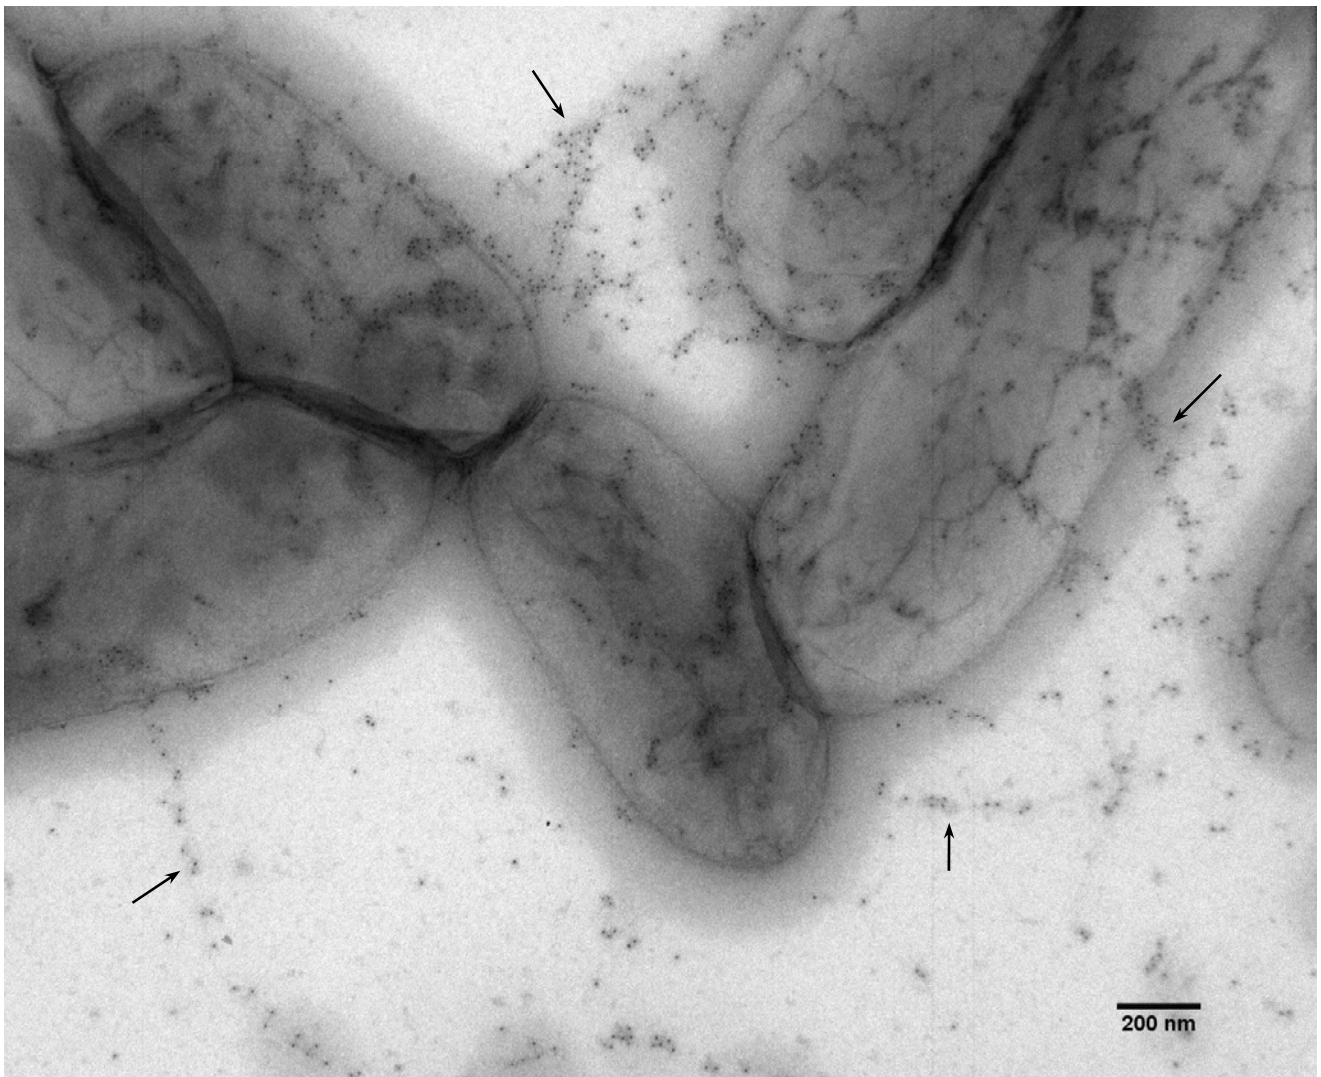

**Figure A1:** Transmission electron micrographs of negative stained *G. sulfurreducens* grown in medium with fumarate as the electron acceptor, labeled with anti-OmcS rabbit polyclonal antibodies and with anti-rabbit IgG conjugated with 10-nm gold secondary antibody. The arrows indicate filaments labeled with gold particles.

Figure A2

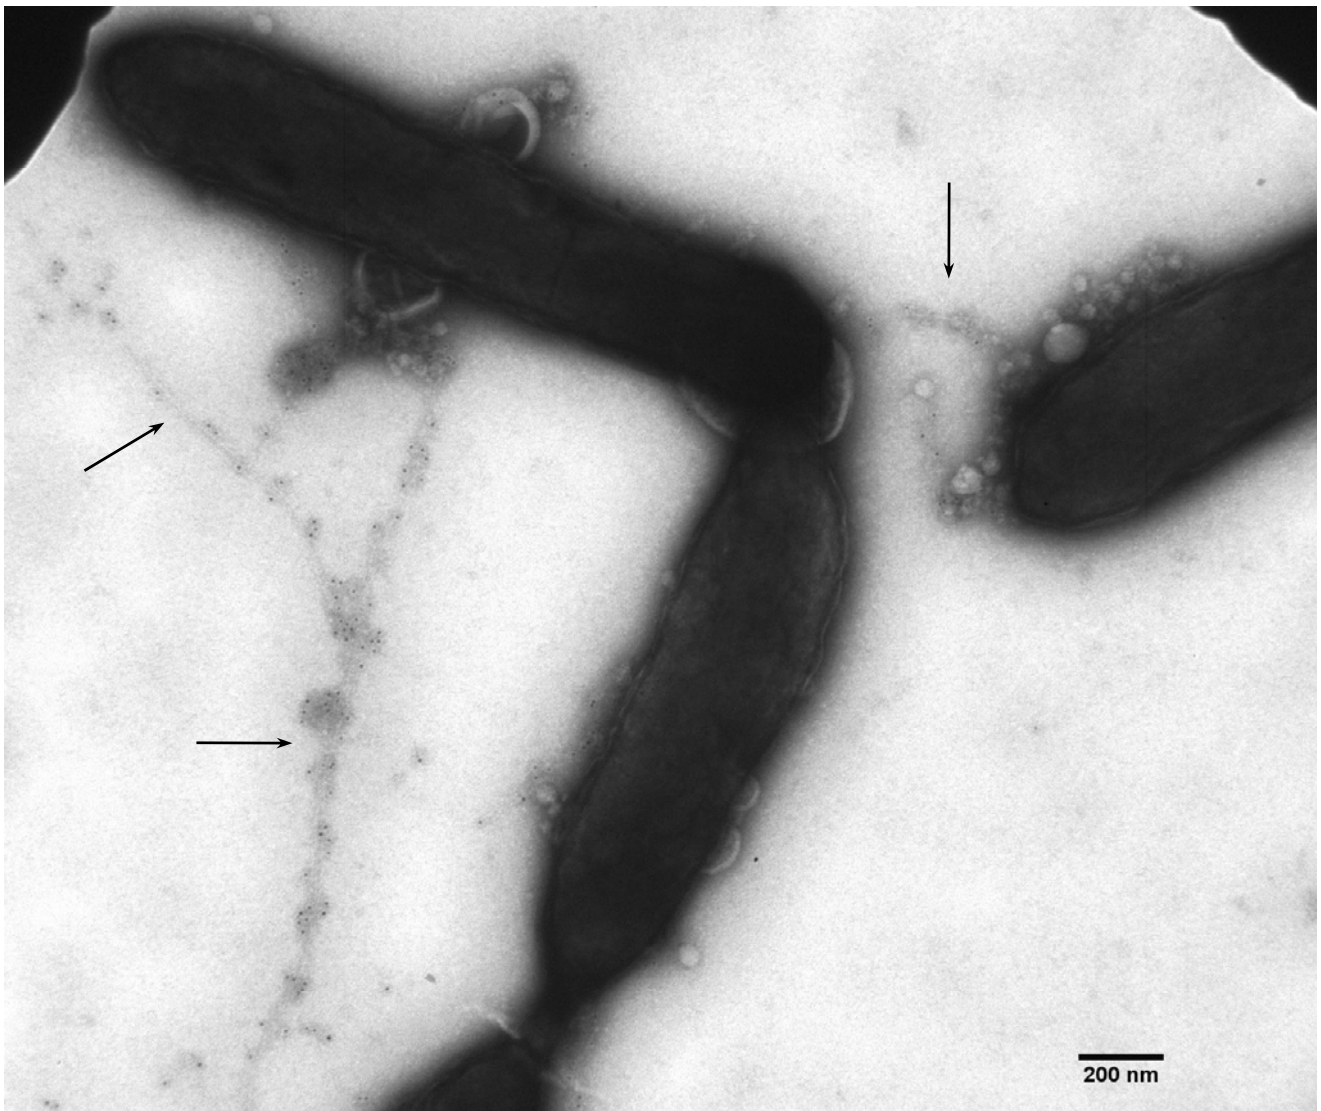

**Figure A2:** Transmission electron micrographs of negative stained *G. sulfurreducens* grown in medium with Fe(III) oxide as the electron acceptor, labeled with anti-OmcS rabbit polyclonal antibodies and with anti-rabbit IgG conjugated with 10-nm gold secondary antibody. The arrows indicate filaments labeled with gold particles.

Figure A3

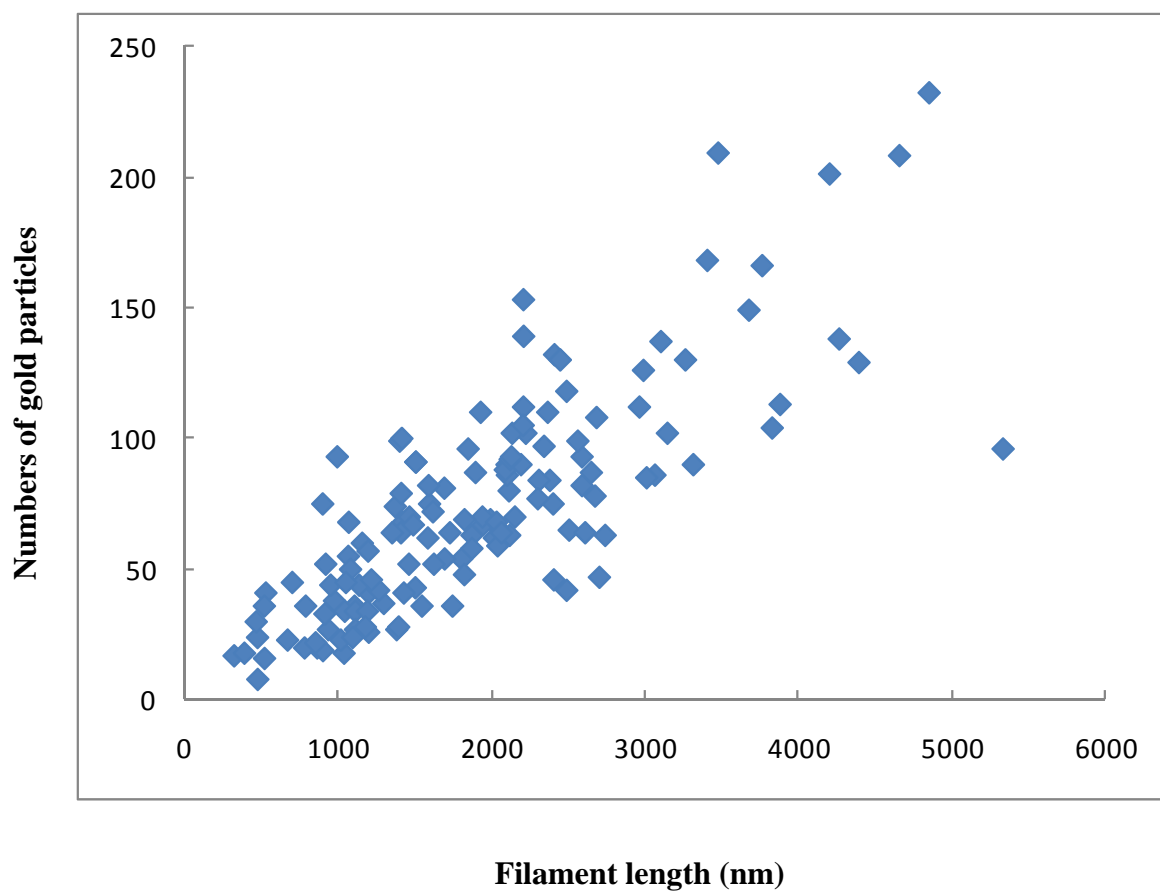

**Figure A3:** Numbers of gold particles (y axis) plotted against the length of the filament (nm). Total of 141 filaments were measured using the software Image J. The average distance of gold particles is  $28.6 \pm 10.5$  nm/per pili.
